# Supplementary material
Source: PubMed Central journal article supplement (PMC8563505)
Supplement: NIHMS1711493-supplement-1.pdf [file NIHMS1711493-supplement-1.pdf]

Supplemental Table 1: Logistic regression of primary outcomes, adjusted for covariates, not including EGA at delivery

|                   |                                 | N = 5330<br>(TTN 4%) | N = 5311<br>(NICU 8%)             | N = 4905<br>(SGA 14%) |
|-------------------|---------------------------------|----------------------|-----------------------------------|-----------------------|
|                   |                                 | Diagnosis of         |                                   |                       |
| Covariate         | Comparison                      | TTN<br>aOR (95% CI)  | NICU<br>admission<br>aOR (95% CI) | SGA<br>aOR (95% CI)   |
| BMZ group         | BMZ exposure vs. No exposure    | 1.32 (0.97, 1.79)    | 1.94 (1.57, 2.40)                 | 1.87 (1.56, 2.23)     |
| Maternal age      | 1-year increase                 | 0.99 (0.96, 1.01)    | 1.00 (0.99, 1.02)                 | 0.97 (0.96, 0.99)     |
| Race              | Black vs. White                 | 1.00 (0.72, 1.41)    | 0.76 (0.58, 0.98)                 | 1.80 (1.49, 2.16)     |
|                   | Other/Unknown vs. White         | 1.68 (1.03, 2.72)    | 0.90 (0.58, 1.38)                 | 1.68 (1.23, 2.31)     |
|                   | Black vs. Other/Unknown         | 0.60 (0.35, 1.03)    | 0.84 (0.53, 1.35)                 | 1.07 (0.76, 1.49)     |
| Insurance         | Medicaid/Government vs. Private | 1.32 (0.97, 1.79)    | 1.44 (1.15, 1.79)                 | 1.28 (1.07, 1.54)     |
|                   | None vs. Private                | 1.15 (0.35, 3.75)    | 0.18 (0.03, 1.34)                 | 1.22 (0.63, 2.39)     |
|                   | Medicaid/Government vs. None    | 1.15 (0.36, 3.70)    | 7.79 (1.08, 56.49)                | 1.05 (0.54, 2.03)     |
|                   |                                 |                      |                                   |                       |
| Maternal diabetes | Yes vs. No                      | 1.44 (0.87, 2.38)    | 1.76 (1.25, 2.48)                 | 0.94 (0.66, 1.35)     |

|                                |            |                   |                   |                   |
|--------------------------------|------------|-------------------|-------------------|-------------------|
| Maternal asthma                | Yes vs. No | 1.23 (0.59, 2.57) | 0.89 (0.49, 1.59) | 1.38 (0.90, 2.13) |
| Maternal hypertensive disorder | Yes vs. No | 1.30 (0.86, 1.97) | 1.19 (0.89, 1.60) | 0.90 (0.69, 1.18) |

---

aOR= adjusted odds ratio; CI= confidence interval; BMZ= betamethasone; EGA= estimated gestational age; TTN= transient tachypnea of the newborn; NICU= neonatal intensive care unit; SGA= small for gestational age. Adjustments made for all other variables in the table.
